# Supplementary material
Source: PubMed Central journal article supplement (PMC1941483)
Supplement: pnas_0705140104_1.pdf [file pnas_0705140104_1.pdf]

**Table 1. Nucleotide diversity and fraction of rare alleles in the EGP data set**

| Allele                  | #Rare SNP | SNP count | Rare DAF    | Total heterozygosity | #Positions | $\pi$       |
|-------------------------|-----------|-----------|-------------|----------------------|------------|-------------|
| exon                    | 962       | 1,679     | 0.572960095 | 159.3238098          | 786,624    | 0.000202647 |
| exoncons                | 651       | 1,053     | 0.618233618 | 87.82191304          | 597,325    | 0.000147074 |
| exonnoncons             | 311       | 626       | 0.496805112 | 71.50189674          | 189,299    | 0.000378147 |
| cns                     | 462       | 836       | 0.552631579 | 82.83716848          | 322,803    | 0.000256731 |
| cnscons                 | 308       | 555       | 0.554954955 | 54.88990217          | 234,340    | 0.000234318 |
| cnsnoncons              | 154       | 281       | 0.548042705 | 27.9472663           | 88,463     | 0.000316121 |
| loose                   | 1,206     | 2,330     | 0.517596567 | 256.9042717          | 747,847    | 0.00034371  |
| loosecons               | 682       | 1,291     | 0.528272657 | 136.8985924          | 464,875    | 0.000294615 |
| loosenoncons            | 524       | 1,039     | 0.504331088 | 120.0056793          | 282,972    | 0.000424386 |
| intergenic              | 766       | 1,573     | 0.486967578 | 177.8974076          | 460,144    | 0.000386865 |
| intergeniccons          | 257       | 515       | 0.499029126 | 59.10669565          | 182,608    | 0.000323824 |
| intergenicnoncons       | 509       | 1,058     | 0.481096408 | 118.790712           | 277,536    | 0.000428357 |
| intron                  | 5,754     | 11,957    | 0.481224387 | 1427.020625          | 3,602,807  | 0.000396632 |
| introncons              | 2,015     | 3,969     | 0.507684555 | 455.2697174          | 1,442,620  | 0.000315739 |
| intronnoncons           | 3,739     | 7,988     | 0.468077116 | 971.7509076          | 2,160,187  | 0.000450144 |
| strictintergenic        | 554       | 1,141     | 0.485539001 | 130.0871739          | 318,667    | 0.00040849  |
| strictintergeniccons    | 180       | 359       | 0.501392758 | 41.03159239          | 125,529    | 0.00032701  |
| strictintergenicnoncons | 374       | 782       | 0.47826087  | 89.05558152          | 193,138    | 0.000461466 |
| Introncd                | 4,075     | 8,571     | 0.475440439 | 1029.483174          | 2,574,129  | 0.000400171 |
| introncdcons            | 2,659     | 5,498     | 0.483630411 | 647.4489239          | 1,737,951  | 0.000372741 |
| introncdnoncons         | 1,416     | 3,073     | 0.460787504 | 382.03425            | 836,178    | 0.000457188 |
| intergeniccd            | 366       | 781       | 0.468629962 | 97.86721196          | 215,508    | 0.000454419 |
| intergeniccdcons        | 213       | 467       | 0.456102784 | 61.21931522          | 141,676    | 0.000432343 |
| intergeniccdnoncons     | 153       | 314       | 0.487261146 | 36.64789674          | 73,832     | 0.000496793 |

Full data for SNPs taken from EGP. See *Methods* for how category partitions were generated. Rare SNP count included all SNPs with frequency  $\leq 0.01$ . cd data sets are based on chimp-dog alignable portions of the genome. All other data sets use four-genome (chimp, dog, mouse, rat) alignments.
