# Supplementary material
Source: PubMed Central journal article supplement (PMC1941483)
Supplement: pnas_0705140104_2.pdf [file pnas_0705140104_2.pdf]

**Table 2. Fraction of rare alleles in the HapMap data set**

| Category            | Subcategory  | # Rare SNPs | SNP count | Rare fraction |
|---------------------|--------------|-------------|-----------|---------------|
| CDS                 | All          | 2,492       | 11,695    | 0.213082514   |
|                     | Conserved    | 1,505       | 6,595     | 0.228203184   |
|                     | Nonconserved | 987         | 5,100     | 0.193529412   |
| CNS                 | All          | 11,825      | 62,215    | 0.190066704   |
|                     | Conserved    | 8,426       | 43,230    | 0.194910941   |
|                     | Nonconserved | 3,399       | 18,985    | 0.179036081   |
| Intron              | All          | 43,606      | 254,061   | 0.171635946   |
|                     | Conserved    | 15,655      | 87,881    | 0.178138619   |
|                     | Nonconserved | 27,951      | 166,180   | 0.168197136   |
| Intergenic          | All          | 61,933      | 376,864   | 0.164337798   |
|                     | Conserved    | 23,056      | 134,854   | 0.170970086   |
|                     | Nonconserved | 38,877      | 242,010   | 0.160642122   |
| Intergenic (strict) | All          | 50,231      | 305,422   | 0.164464249   |
|                     | Conserved    | 18,614      | 109,348   | 0.170227165   |
|                     | Nonconserved | 31,617      | 196,074   | 0.161250344   |
| Intron (CD)         | All          | 34,671      | 208,995   | 0.165893921   |
|                     | Conserved    | 22,726      | 133,981   | 0.169621066   |
|                     | Nonconserved | 11,945      | 75,014    | 0.159236942   |
| Intergenic (CD)     | All          | 55,196      | 347,589   | 0.15879674    |
|                     | Conserved    | 36,038      | 223,587   | 0.161181106   |
|                     | Nonconserved | 19,158      | 124,002   | 0.154497508   |

Allele frequency data taken from HapMap project. See *Methods* for how category partitions were generated. SNPs are from HapMap phaseII Yoruba population. Rare SNPs included all SNPs with  $DAF \leq 0.05$ .
